# Supplementary material for: Quantum mechanics/molecular mechanics studies on the excited-state decay mechanisms of cytidine aza-analogues: 5-azacytidine and 2′-deoxy-5-azacytidine in aqueous solution
Source: Royal Society of Chemistry journal article supplement (doi:10.1039/d3cp03628f), 2023-01-01
Supplement: d3cp03628f1.pdf [file d3cp03628f1.pdf]

## **Quantum mechanics/molecular mechanics studies on the excited-state decay mechanisms of cytidine aza-analogues: 5-azacytidine and 2'-deoxy-5-azacytidine in aqueous solution**

Xue-Ping Chang,<sup>\*a</sup> Feng-Ran Fan,<sup>a</sup> Teng-Shuo Zhang<sup>b</sup> and Bin-Bin Xie<sup>c</sup>

<sup>a</sup> College of Chemistry and Chemical Engineering, Xinyang Normal University, Xinyang 464000, China

<sup>b</sup> College of Chemical Engineering, Zhejiang University of Technology, Hangzhou 310014, China

<sup>c</sup> Hangzhou Institute of Advanced Studies, Zhejiang Normal University, Hangzhou 311231, China

E-mail: [xuepingchang@xynu.edu.cn](mailto:xuepingchang@xynu.edu.cn)

### **Contents**

1. Active Orbitals
2. The Effective Spin–Orbit Couplings Expression
3. The 5-Water Hydrogen-Bond Network
4. Bond-Length Difference and Dihedral Angles of Minima and Conical Intersections and Crossing Points
5. Tables
6. Cartesian Coordinates of All Optimized Structures

## 1. Active Orbitals

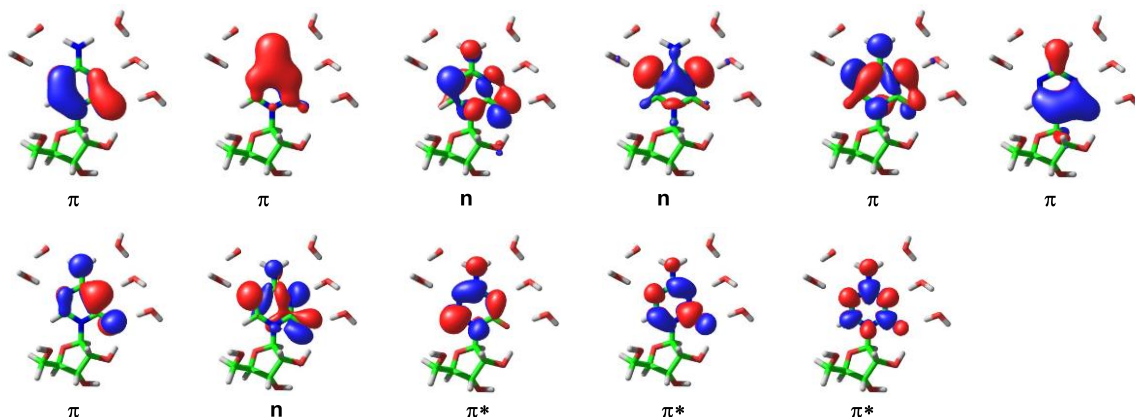

**Figure S1.** Molecular orbitals included in the active space for 5ACyd used for QM/MM calculations.

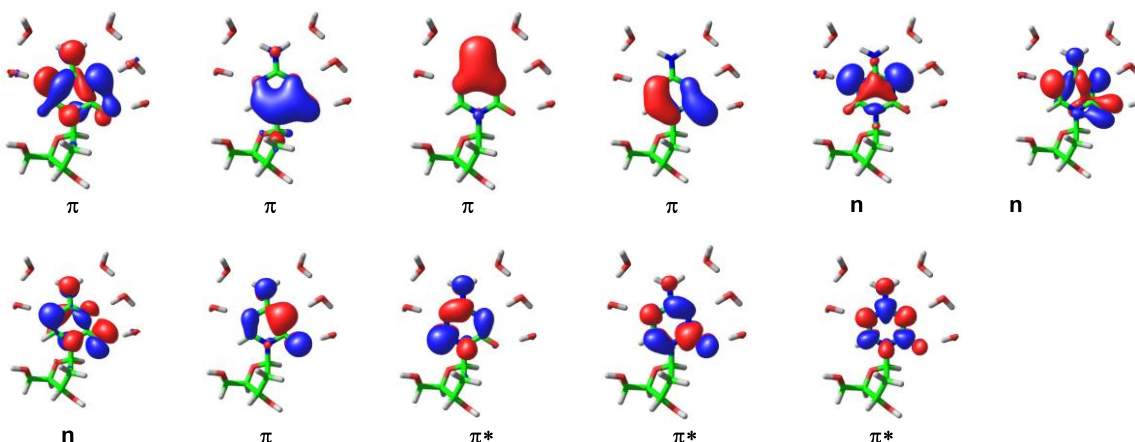

**Figure S2.** Molecular orbitals included in the active space for 5AdCyd used for QM/MM calculations.

## 2. The Effective Spin–Orbit Couplings Expression

Spin-orbit couplings are obtained at the QM(CASPT2)/MM level within the atomic mean-field (AMFI) approximation. The effective spin-orbit couplings are expressed as follows:

$$\langle \psi_I | H_{eff}^{so} | \psi_J \rangle = \sqrt{\frac{|\langle \psi_I | H_x^{so} | \psi_J \rangle|^2 + |\langle \psi_I | H_y^{so} | \psi_J \rangle|^2 + |\langle \psi_I | H_z^{so} | \psi_J \rangle|^2}{3}}$$

in which  $\psi_I$  and  $\psi_J$  are the perturbatively modified electronic wave functions of the corresponding singlet and triplet states;  $H_x^{so}$ ,  $H_y^{so}$ ,  $H_z^{so}$  are the  $x$ ,  $y$ , and  $z$  components of the spin-orbit operator.

### **3. The 5-Water Hydrogen-Bond Network**

In our 50 ps MD simulations of aqueous 5ACyd and 5AdCyd, we found a compact 5-water hydrogen-bond network always around the N3 and N5 ring atoms and NH and C=O groups. This situation is similar to 5-7 water hydrogen-bonded network used in 5-AC, 2-AT, and 2,4-DT systems recently by our group (refs. 15,30 in main text) and 4-water hydrogen-bonded network used in 2'-Deoxy-5-formylcytidine system (5fdCyd·4H<sub>2</sub>O) by Wang et al. [1] and 5-D<sub>2</sub>O hydrogen-bonded network used in acid form guanosine 5'-monophosphate (9Me-GN7D<sup>+</sup>·5D<sub>2</sub>O) by Zhang et al. [2]. The final MD snapshot that deletes frozen water molecules generates the starting structure for the following QM/MM computations. This strategy has been used in many similar works before (refs. 15,26-30 in main text).

[1] X. Wang, L. Martínez-Fernández, Y. Zhang, K. Zhang, R. Improta, B. Kohler, J. Xu and J. Chen, *Chem. Eur. J.*, 2021, 27, 10932-10940.

[2] Y. Zhang, R. Improta and B. Kohler. *Phys. Chem. Chem. Phys.*, 2014, 16, 1487-1499.

#### 4. Bond-Length Difference and Dihedral Angles of Minima and Conical Intersections and Crossing Points

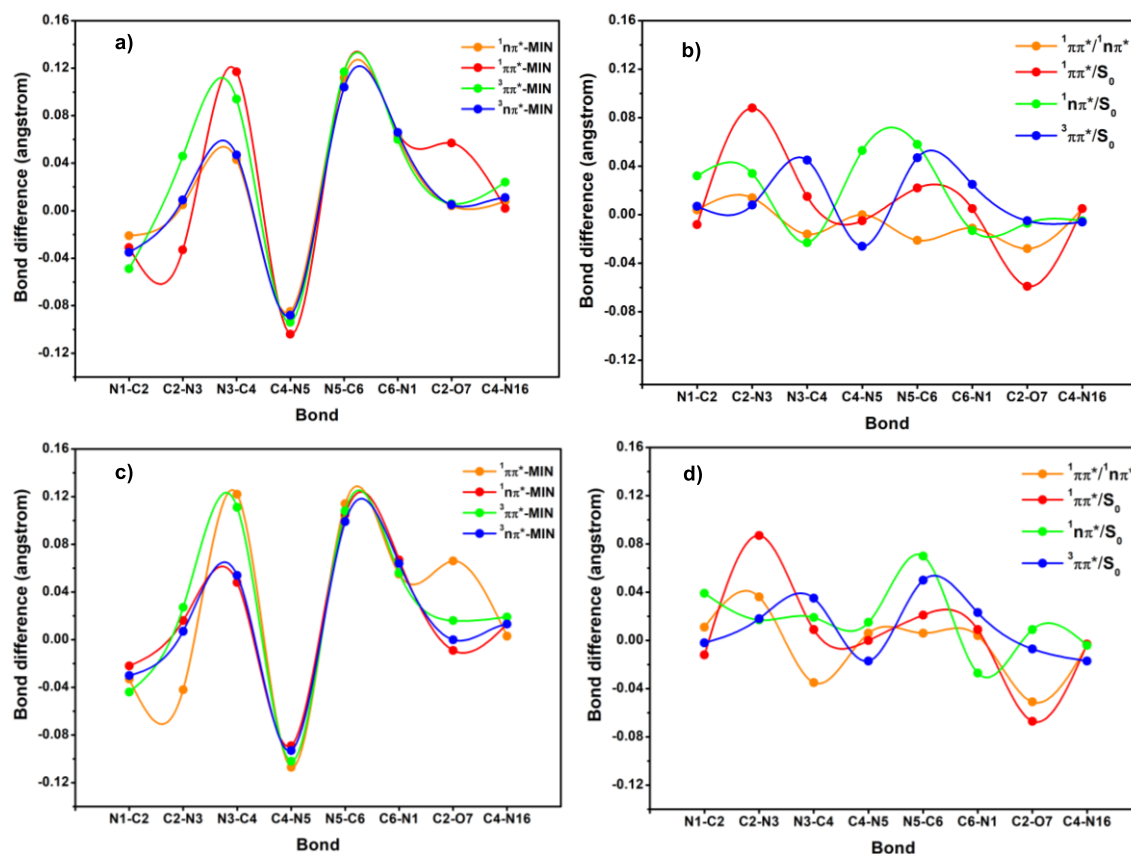

**Figure S3.** QM(CASSCF)/MM computed bond-length difference (in Å) of excited-state minima compared with the counterparts of the  $S_0$  minimum  $S_0$ -MIN (a) for 5ACyd and (c) for 5AdCyd. The positive and negative values mean they are longer and shorter than those of  $S_0$ -MIN, respectively. Bond-length difference (in Å) of crossing structures compared with the counterparts of the corresponding excited-state minimum (b) for 5ACyd and (d) for 5AdCyd, respectively.

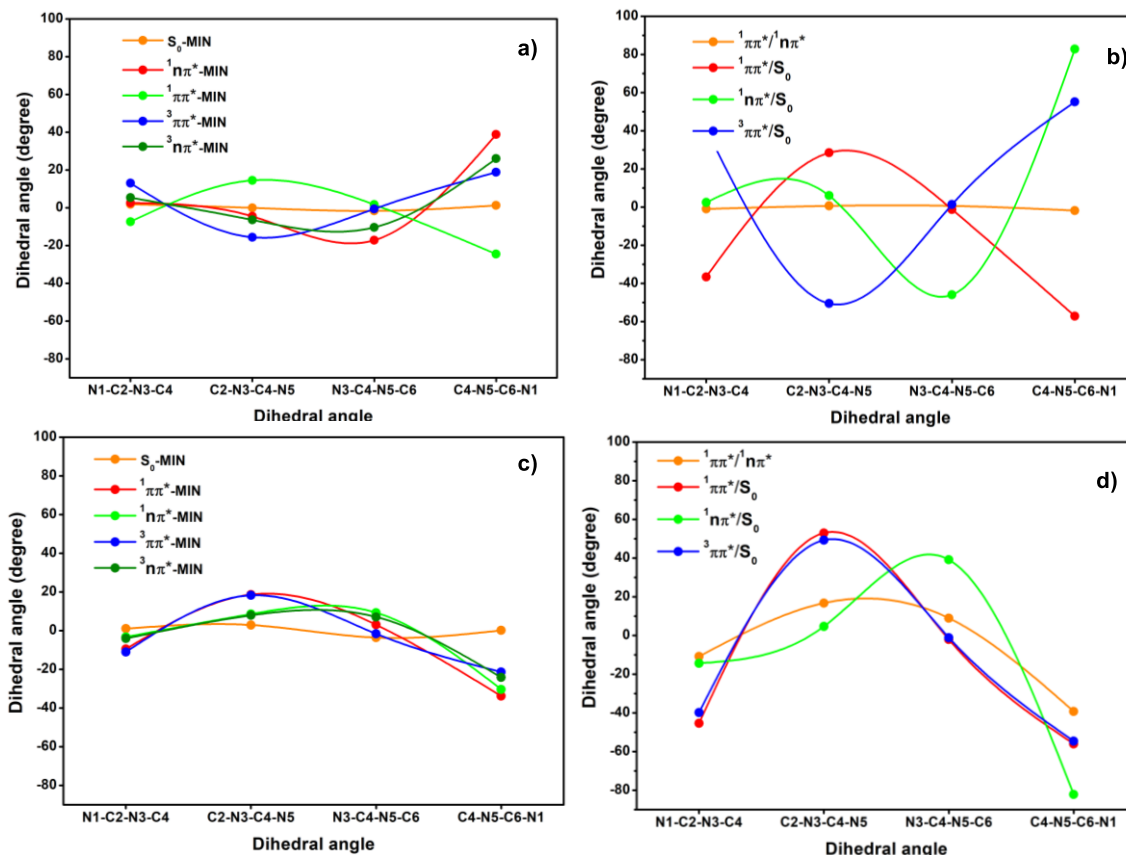

**Figure S4.** QM(CASSCF)/MM computed dihedral angles (in °) of minima and conical intersections and crossing points (a and b) for 5ACyd and (c and d) for 5AdCyd, respectively.

## 4. Tables

**Table S1** QM(CASPT2)/MM computed vertical excitation energies (in kcal/mol [eV]) of the low-lying excited singlet and triplet states at the  $S_0$ -MIN of 5-AC<sup>a</sup>, 5ACyd, and 5AdCyd in aqueous solution.

|                   | $^1n\pi^*$   | $^1\pi\pi^*$ | $T_1(\pi\pi^*)$ | $T_2(\pi\pi^*)$ |
|-------------------|--------------|--------------|-----------------|-----------------|
| 5-AC <sup>a</sup> | 112.0 [4.86] | 112.6 [4.88] | 103.9 [4.51]    | 104.9 [4.55]    |
| 5ACyd             | 113.8 [4.93] | 114.2 [4.95] | 101.7 [4.41]    | 107.8 [4.67]    |
| 5AdCyd            | 112.4 [4.88] | 112.2 [4.86] | 101.3 [4.39]    | 105.4 [4.57]    |

a. *Phys. Chem. Chem. Phys.*, 2022, 24, 27793-27803.

**Table S2** QM(CASPT2)/MM computed adiabatic excitation energies (in kcal/mol) of the optimized minima, conical intersections and crossing points of 5-AC<sup>a</sup>, 5ACyd, and 5AdCyd in aqueous solution.

|        | $^1n\pi^*$ -<br>MIN | $^1\pi\pi^*$ -<br>MIN | $^3\pi\pi^*$ -<br>MIN | $^3n\pi^*$ -<br>MIN | $^1\pi\pi^*/^1n\pi^*$ | $^1\pi\pi^*/S_0$ | $^1n\pi^*/S_0$ | $^3\pi\pi^*/S_0$ |
|--------|---------------------|-----------------------|-----------------------|---------------------|-----------------------|------------------|----------------|------------------|
| 5-AC   | 91.6                | 95.0                  | 83.6                  | 96.8                | 95.1/95.1             | 86.5/86.4        | 97.0/94.1      | 91.6/86.4        |
| 5ACyd  | 93.7                | 97.2                  | 90.1                  | 102.6               | 102.9/102.8           | 89.8/85.9        | 99.7/96.2      | 98.5/93.1        |
| 5AdCyd | 92.9                | 91.0                  | 84.3                  | 99.3                | 95.2/94.3             | 86.6/82.5        | 97.8/91.5      | 91.1/84.7        |

a. *Phys. Chem. Chem. Phys.*, 2022, 24, 27793-27803.

## 5. Cartesian Coordinates of All Optimized Structures

In xyz format (unit: Ångstrom)

### CASSCF/ANO-L-VDZP

**For 5ACyd**

S<sub>0</sub>-MIN

|   |              |              |              |
|---|--------------|--------------|--------------|
| H | -1.797619131 | 2.624541187  | 1.924019139  |
| O | -1.795793131 | 1.861366135  | 1.363817096  |
| C | -2.630341187 | 2.054946147  | 0.250402017  |
| H | -2.270744164 | 2.884995207  | -0.358938028 |
| H | -3.654808264 | 2.269821162  | 0.561631039  |
| C | -2.645495188 | 0.804988056  | -0.602038045 |
| H | -3.340635239 | 0.961852068  | -1.423304101 |
| O | -1.357975096 | 0.573128039  | -1.165083083 |
| C | -0.771668056 | -0.588352040 | -0.689662050 |
| H | -0.733173052 | -1.347334098 | -1.467193105 |
| N | 0.624552045  | -0.286105019 | -0.320818025 |
| C | 1.138623082  | 0.963157072  | -0.376332026 |
| H | 0.455823032  | 1.747201123  | -0.641305045 |
| C | 3.182807230  | 0.162635013  | 0.170007013  |
| N | 4.456137319  | 0.463038036  | 0.403965027  |
| H | 5.112810370  | -0.272614021 | 0.593381044  |
| H | 4.808907347  | 1.353792098  | 0.113078008  |
| N | 2.767016198  | -1.070314078 | 0.251591021  |
| C | 1.460190105  | -1.346539099 | 0.028561003  |
| O | 0.994715071  | -2.462657178 | 0.112112011  |
| C | -3.008538219 | -0.480789033 | 0.130357010  |
| H | -3.610087262 | -0.290952023 | 1.018417073  |
| C | -1.643695117 | -1.069103077 | 0.485236037  |
| H | -1.281087091 | -0.619357043 | 1.406447102  |
| O | -3.691781265 | -1.306184095 | -0.763178053 |
| H | -3.562031258 | -2.212120157 | -0.509150039 |
| N | 2.367940171  | 1.242646090  | -0.135613010 |
| O | -1.756273126 | -2.446534174 | 0.596944042  |
| H | -0.888797064 | -2.833578203 | 0.564620038  |
| O | 3.143241224  | 4.273954308  | -0.232466015 |
| H | 2.853664205  | 3.371447241  | -0.140367012 |
| H | 3.065562222  | 4.678230338  | 0.621852045  |
| O | 6.447964463  | -1.739069124 | 1.176186084  |
| H | 5.926578429  | -2.525755183 | 1.017002074  |
| H | 7.344672531  | -1.951913141 | 0.957863066  |

|   |             |              |              |
|---|-------------|--------------|--------------|
| O | 4.517229324 | -3.600451262 | 0.430052031  |
| H | 4.026174290 | -4.197337301 | 0.984879073  |
| H | 3.928484280 | -2.867663208 | 0.278477019  |
| O | 5.625748407 | 3.038558217  | -0.918387068 |
| H | 4.947900355 | 3.702682268  | -0.838829063 |
| H | 6.029832435 | 3.135477226  | -1.770170125 |
| O | 2.110671152 | -4.681675335 | 1.809695131  |
| H | 1.722630122 | -4.017841288 | 1.249714088  |
| H | 1.622020117 | -5.480961395 | 1.668688121  |

<sup>1</sup>nπ\*-MIN

|   |              |              |              |
|---|--------------|--------------|--------------|
| H | -1.974440142 | 2.596005188  | 2.026466145  |
| O | -2.036223147 | 1.809401130  | 1.504118109  |
| C | -2.818245202 | 2.030402145  | 0.359534025  |
| H | -2.431008177 | 2.871973208  | -0.215666013 |
| H | -3.854823278 | 2.242155162  | 0.633002048  |
| C | -2.804404200 | 0.804913056  | -0.528757040 |
| H | -3.510360253 | 0.969984072  | -1.339470095 |
| O | -1.521337108 | 0.620539045  | -1.106698078 |
| C | -0.891560062 | -0.533816038 | -0.659523046 |
| H | -0.849214061 | -1.270752090 | -1.462022106 |
| N | 0.476801036  | -0.172367011 | -0.269217020 |
| C | 1.093895079  | 0.970584069  | -0.829648060 |
| H | 0.446018034  | 1.789841131  | -1.068960078 |
| C | 3.168569230  | 0.381970029  | 0.126251008  |
| N | 4.432040317  | 0.620316044  | 0.494122034  |
| H | 5.011162363  | -0.171710011 | 0.705167050  |
| H | 4.884983350  | 1.400869103  | 0.057016002  |
| N | 2.638297192  | -0.851674063 | 0.227198018  |
| C | 1.331689094  | -1.191618088 | 0.073445008  |
| O | 0.946402066  | -2.332096170 | 0.244244019  |
| C | -3.131422225 | -0.509214037 | 0.166885010  |
| H | -3.739286268 | -0.362814024 | 1.058631078  |
| C | -1.749268127 | -1.063511076 | 0.504897036  |
| H | -1.395592100 | -0.621135047 | 1.432203101  |
| O | -3.789940274 | -1.332218097 | -0.749760054 |
| H | -3.631433261 | -2.239208163 | -0.518145036 |
| N | 2.315674165  | 1.295905091  | -0.239391019 |
| O | -1.825114133 | -2.448337176 | 0.594131042  |
| H | -0.945633066 | -2.805727202 | 0.589839044  |
| O | 3.214834233  | 4.458473319  | -0.144215009 |
| H | 2.821545204  | 3.598382258  | -0.056431001 |
| H | 3.155321230  | 4.872152352  | 0.707511051  |

|   |             |              |              |
|---|-------------|--------------|--------------|
| O | 6.303048454 | -1.676789121 | 1.072275077  |
| H | 5.910722426 | -2.524262183 | 0.867350060  |
| H | 7.079129509 | -1.845876133 | 1.586402112  |
| O | 5.025703360 | -4.066525293 | 0.350484025  |
| H | 4.214576303 | -4.280954307 | 0.807341059  |
| H | 4.843603351 | -4.157638302 | -0.574019041 |
| O | 5.618935403 | 3.088485222  | -0.970324069 |
| H | 4.972576356 | 3.773043274  | -0.827534060 |
| H | 6.018966432 | 3.238007233  | -1.816359129 |
| O | 2.449342179 | -4.483252324 | 1.523207109  |
| H | 1.917844138 | -3.793002273 | 1.136769083  |
| H | 1.884744138 | -5.226768378 | 1.684535123  |

$^1\Pi\Pi^*$ -MIN

|   |              |              |              |
|---|--------------|--------------|--------------|
| H | -1.845152134 | 2.620448187  | 1.880363133  |
| O | -2.004061146 | 1.810937131  | 1.416428104  |
| C | -2.704597196 | 2.044468147  | 0.222344018  |
| H | -2.250023160 | 2.858251208  | -0.343131022 |
| H | -3.745145271 | 2.304931168  | 0.431672033  |
| C | -2.692517196 | 0.799792059  | -0.641675046 |
| H | -3.380973241 | 0.956134070  | -1.468714108 |
| O | -1.402738099 | 0.573227043  | -1.195727086 |
| C | -0.798122055 | -0.573005042 | -0.702886052 |
| H | -0.768961055 | -1.344057099 | -1.470081105 |
| N | 0.591639040  | -0.237105016 | -0.364936025 |
| C | 0.999357072  | 1.088740078  | -0.071726007 |
| H | 0.353328024  | 1.850242131  | -0.475540034 |
| C | 3.157826228  | 0.392538026  | 0.149005010  |
| N | 4.483663325  | 0.503337037  | 0.201196016  |
| H | 5.056083362  | -0.287097020 | 0.427001028  |
| H | 4.923855356  | 1.360456096  | -0.078549007 |
| N | 2.729716198  | -0.947366068 | 0.349910026  |
| C | 1.479021105  | -1.203073088 | 0.009817000  |
| O | 1.090084077  | -2.410840173 | 0.040127003  |
| C | -3.053846222 | -0.487500037 | 0.086921004  |
| H | -3.676134266 | -0.305961019 | 0.961912071  |
| C | -1.683918123 | -1.046451074 | 0.468706032  |
| H | -1.345754096 | -0.587853042 | 1.393629101  |
| O | -3.705178265 | -1.325971096 | -0.819985061 |
| H | -3.615639263 | -2.226641161 | -0.535011037 |
| N | 2.368672171  | 1.380696099  | -0.070419003 |
| O | -1.792200129 | -2.431061174 | 0.597406046  |
| H | -0.941280070 | -2.839315204 | 0.647506044  |



|   |             |              |              |
|---|-------------|--------------|--------------|
| O | 3.201008229 | 4.222065304  | -0.277008018 |
| H | 2.872249206 | 3.327139240  | -0.179157011 |
| H | 3.112421222 | 4.643871335  | 0.567195041  |
| O | 6.447578466 | -1.740918128 | 1.102509079  |
| H | 5.939680429 | -2.541659182 | 0.977750071  |
| H | 7.350613530 | -1.949555138 | 0.906637063  |
| O | 4.442845318 | -3.612430258 | 0.479982032  |
| H | 4.024003287 | -4.190060304 | 1.106477078  |
| H | 3.866809280 | -2.859985206 | 0.402599030  |
| O | 5.711674410 | 3.080576224  | -0.998115071 |
| H | 4.967702358 | 3.664026262  | -0.866030065 |
| H | 5.952960428 | 3.132694224  | -1.913882135 |
| O | 2.120855153 | -4.835199349 | 1.956466140  |
| H | 1.689304121 | -4.394985315 | 1.237783088  |
| H | 1.737178125 | -5.699303410 | 2.023757144  |

${}^3\Pi\Pi^*$ -MIN

|   |              |              |              |
|---|--------------|--------------|--------------|
| H | -1.813810129 | 2.657381192  | 1.898950134  |
| O | -1.882707134 | 1.861848136  | 1.390514099  |
| C | -2.686321192 | 2.062169147  | 0.256002020  |
| H | -2.294690165 | 2.876004205  | -0.354888023 |
| H | -3.712023268 | 2.304135164  | 0.543809037  |
| C | -2.714622194 | 0.806014057  | -0.587869044 |
| H | -3.428030248 | 0.957333069  | -1.394422099 |
| O | -1.443495103 | 0.569466042  | -1.178278086 |
| C | -0.836852062 | -0.579189039 | -0.699905049 |
| H | -0.825396057 | -1.349881097 | -1.469964104 |
| N | 0.562468038  | -0.256572018 | -0.369516027 |
| C | 1.102805080  | 1.021218072  | -0.633390046 |
| H | 0.401432030  | 1.828332129  | -0.602488042 |
| C | 3.159322228  | 0.314416023  | 0.177913011  |
| N | 4.423635321  | 0.497158035  | 0.624676047  |
| H | 5.017051359  | -0.307303024 | 0.692355049  |
| H | 4.878368354  | 1.338991095  | 0.325625024  |
| N | 2.763631199  | -1.023368071 | 0.080863004  |
| C | 1.393635102  | -1.270939091 | -0.065658006 |
| O | 1.021425075  | -2.419347174 | 0.098794006  |
| C | -3.060576218 | -0.473792034 | 0.161404014  |
| H | -3.648618261 | -0.280423021 | 1.057375076  |
| C | -1.685052124 | -1.047560076 | 0.497711036  |
| H | -1.308303095 | -0.584678042 | 1.405973102  |
| O | -3.753108272 | -1.310661093 | -0.715476052 |
| H | -3.638079262 | -2.212504159 | -0.442470033 |

|   |              |              |              |
|---|--------------|--------------|--------------|
| N | 2.387276170  | 1.298521095  | -0.149453012 |
| O | -1.792613130 | -2.427707174 | 0.632152046  |
| H | -0.931315069 | -2.822155203 | 0.622890047  |
| O | 3.190959227  | 4.265742308  | -0.239533018 |
| H | 2.879849207  | 3.368610242  | -0.153025011 |
| H | 3.125243223  | 4.665705337  | 0.617467044  |
| O | 6.436372465  | -1.834852133 | 1.173450084  |
| H | 5.960777429  | -2.635997192 | 0.964691067  |
| H | 7.354725528  | -2.004699143 | 1.015303071  |
| O | 4.558005326  | -3.741322267 | 0.308326024  |
| H | 4.031644289  | -4.267299306 | 0.902104067  |
| H | 3.991432290  | -3.029882218 | 0.038132005  |
| O | 5.674571406  | 3.020258220  | -0.944659067 |
| H | 4.968081355  | 3.651801262  | -0.849335062 |
| H | 5.982233429  | 3.067693219  | -1.839532134 |
| O | 2.184377156  | -4.725289340 | 1.820555129  |
| H | 1.717214125  | -4.104724297 | 1.276198091  |
| H | 1.698343125  | -5.538903398 | 1.796845130  |

${}^3n\pi^*$ -MIN

|   |              |              |              |
|---|--------------|--------------|--------------|
| H | -1.918177139 | 2.608542185  | 1.958739141  |
| O | -1.951360140 | 1.825029132  | 1.429186102  |
| C | -2.758186198 | 2.021613146  | 0.296779022  |
| H | -2.385357172 | 2.853582203  | -0.301544019 |
| H | -3.789547275 | 2.235921163  | 0.586648041  |
| C | -2.756435198 | 0.778423057  | -0.566807043 |
| H | -3.464916247 | 0.932375070  | -1.377467101 |
| O | -1.476757105 | 0.573044043  | -1.145999083 |
| C | -0.854462059 | -0.576437043 | -0.680788050 |
| H | -0.820557059 | -1.330550098 | -1.466944106 |
| N | 0.523515037  | -0.227680014 | -0.311260021 |
| C | 1.092316078  | 1.010689074  | -0.703756051 |
| H | 0.413791028  | 1.839677134  | -0.723925050 |
| C | 3.193301228  | 0.348602027  | 0.170666013  |
| N | 4.464642319  | 0.569135042  | 0.532978038  |
| H | 5.046964363  | -0.230638015 | 0.699575048  |
| H | 4.911744351  | 1.365606096  | 0.122248009  |
| N | 2.672386193  | -0.897362062 | 0.212670013  |
| C | 1.364165099  | -1.238184088 | 0.039288003  |
| O | 0.986758070  | -2.384709173 | 0.197644014  |
| C | -3.091543221 | -0.518631037 | 0.157425014  |
| H | -3.690829264 | -0.347956023 | 1.050804075  |
| C | -1.711946123 | -1.078564079 | 0.496135035  |

|   |              |              |              |
|---|--------------|--------------|--------------|
| H | -1.350118099 | -0.625022044 | 1.415076104  |
| O | -3.765725271 | -1.351923096 | -0.737791055 |
| H | -3.615317258 | -2.256037164 | -0.490112035 |
| N | 2.352945171  | 1.271571093  | -0.188400013 |
| O | -1.796295130 | -2.461363175 | 0.606595044  |
| H | -0.920242067 | -2.826877205 | 0.595536044  |
| O | 3.220750234  | 4.457235319  | -0.154177009 |
| H | 2.830822205  | 3.594364258  | -0.082220005 |
| H | 3.159007230  | 4.854308347  | 0.703720051  |
| O | 6.328350455  | -1.777378128 | 1.147149080  |
| H | 5.899594427  | -2.593724185 | 0.892504067  |
| H | 7.254556525  | -1.961161143 | 1.238163090  |
| O | 4.853759347  | -4.011778287 | 0.249409016  |
| H | 4.123341298  | -4.286124311 | 0.795643056  |
| H | 4.479003322  | -3.812748273 | -0.598352045 |
| O | 5.620277402  | 3.058153222  | -0.961312069 |
| H | 4.974629357  | 3.744046271  | -0.826049062 |
| H | 5.989382433  | 3.175853228  | -1.825862131 |
| O | 2.374436171  | -4.541745328 | 1.661913118  |
| H | 1.857501136  | -3.863996280 | 1.237982091  |
| H | 1.839824134  | -5.323913383 | 1.700335122  |

${}^1\pi\pi^*/{}^1n\pi^*$

|   |              |              |              |
|---|--------------|--------------|--------------|
| H | -1.902106137 | 2.616296188  | 1.922209136  |
| O | -1.954184142 | 1.823074129  | 1.408919100  |
| C | -2.730588197 | 2.022522145  | 0.256411021  |
| H | -2.340778169 | 2.852272204  | -0.334068026 |
| H | -3.768327272 | 2.240337163  | 0.520292035  |
| C | -2.712741197 | 0.776614054  | -0.603461045 |
| H | -3.404687245 | 0.927004069  | -1.428760104 |
| O | -1.421152102 | 0.566472042  | -1.158078083 |
| C | -0.810976056 | -0.581034042 | -0.676543048 |
| H | -0.774184056 | -1.341697095 | -1.455036104 |
| N | 0.567569043  | -0.240283016 | -0.304358020 |
| C | 1.064877079  | 1.073227078  | -0.379452029 |
| H | 0.399831031  | 1.856564132  | -0.659625045 |
| C | 3.202970233  | 0.381056028  | 0.155408012  |
| N | 4.507170326  | 0.530422038  | 0.403075030  |
| H | 5.078844366  | -0.272817019 | 0.588240045  |
| H | 4.952985357  | 1.377242101  | 0.102208009  |
| N | 2.727742197  | -0.936557067 | 0.259016018  |
| C | 1.448006106  | -1.233906087 | 0.024987004  |
| O | 1.065640078  | -2.411313173 | 0.110928008  |

|   |              |              |              |
|---|--------------|--------------|--------------|
| C | -3.061796221 | -0.516669039 | 0.122034010  |
| H | -3.679073264 | -0.340623024 | 1.002231070  |
| C | -1.688086119 | -1.072272077 | 0.490193036  |
| H | -1.342640095 | -0.613302043 | 1.412649102  |
| O | -3.716737269 | -1.354530099 | -0.782386054 |
| H | -3.588534259 | -2.257269163 | -0.518242039 |
| N | 2.400864172  | 1.332760096  | -0.157017013 |
| O | -1.775252127 | -2.456363175 | 0.609829042  |
| H | -0.908670067 | -2.839551206 | 0.596490045  |
| O | 3.206297229  | 4.287278309  | -0.250835017 |
| H | 2.886153206  | 3.392076242  | -0.174852011 |
| H | 3.104962225  | 4.690796340  | 0.601217043  |
| O | 6.386414461  | -1.794090128 | 1.170595083  |
| H | 5.906673426  | -2.602184190 | 0.997482070  |
| H | 7.304784526  | -1.980790142 | 1.031399077  |
| O | 4.620885331  | -3.832215276 | 0.330602026  |
| H | 4.040966291  | -4.283967310 | 0.934880068  |
| H | 4.061838291  | -3.237651235 | -0.152110011 |
| O | 5.705541409  | 3.077454221  | -0.948577069 |
| H | 4.994264357  | 3.702705266  | -0.842672059 |
| H | 5.999594432  | 3.125780227  | -1.849175135 |
| O | 2.223738159  | -4.709666340 | 1.847417134  |
| H | 1.748722127  | -4.058452292 | 1.345853095  |
| H | 1.727948126  | -5.516703397 | 1.797632128  |

${}^1\pi\pi^*/S_0$

|   |              |              |              |
|---|--------------|--------------|--------------|
| H | -2.236084160 | 2.622666191  | 1.959825140  |
| O | -2.111847154 | 1.867901136  | 1.402013099  |
| C | -2.779126202 | 2.042120145  | 0.175607015  |
| H | -2.369908170 | 2.895755206  | -0.365081025 |
| H | -3.846608278 | 2.205929159  | 0.338448026  |
| C | -2.611819190 | 0.810021061  | -0.687123047 |
| H | -3.229073234 | 0.935412065  | -1.574654113 |
| O | -1.257814093 | 0.686716052  | -1.098758081 |
| C | -0.697124048 | -0.519108038 | -0.702051053 |
| H | -0.667384048 | -1.234146090 | -1.523110111 |
| N | 0.674273047  | -0.258601021 | -0.308053021 |
| C | 1.063954077  | 0.852192064  | 0.491073037  |
| H | 0.281484021  | 1.484910107  | 0.860471063  |
| C | 3.165143230  | 0.464084034  | 0.240616017  |
| N | 4.468625320  | 0.474037033  | -0.050560002 |
| H | 5.070070364  | -0.213158015 | 0.364546026  |
| H | 4.883530351  | 1.324412097  | -0.384436026 |

|   |              |              |              |
|---|--------------|--------------|--------------|
| N | 2.682715193  | -0.822369057 | 0.658232049  |
| C | 1.533860109  | -1.267669093 | -0.024310001 |
| O | 1.372705099  | -2.450330174 | -0.219915015 |
| C | -2.975906213 | -0.511472037 | -0.009278001 |
| H | -3.639894261 | -0.365302025 | 0.841454062  |
| C | -1.611348115 | -1.046585077 | 0.414239030  |
| H | -1.326743097 | -0.594168042 | 1.361621100  |
| O | -3.570443255 | -1.340746095 | -0.962824071 |
| H | -3.462311250 | -2.246307161 | -0.699811051 |
| N | 2.322110167  | 1.419941101  | 0.147984010  |
| O | -1.656990119 | -2.436532173 | 0.517184039  |
| H | -0.790947057 | -2.813897201 | 0.457329034  |
| O | 3.196302229  | 4.257147305  | -0.295835022 |
| H | 2.810536201  | 3.392998244  | -0.154241013 |
| H | 3.157896227  | 4.714134337  | 0.533644039  |
| O | 6.363480458  | -1.638287116 | 1.169748082  |
| H | 5.885607425  | -2.464737178 | 1.168386085  |
| H | 7.229246522  | -1.822948132 | 0.831840060  |
| O | 4.485232325  | -3.698417264 | 0.798900057  |
| H | 4.051284290  | -4.325523314 | 1.366937099  |
| H | 3.825472277  | -3.044935221 | 0.614409045  |
| O | 5.654095406  | 3.082546224  | -1.166458086 |
| H | 4.923868352  | 3.666559264  | -0.973593072 |
| H | 5.899751423  | 3.221635230  | -2.071084149 |
| O | 2.006726146  | -4.863641351 | 1.879332137  |
| H | 1.683203120  | -4.382555318 | 1.129710081  |
| H | 1.496206110  | -5.660413406 | 1.941677138  |

${}^1n\pi^*/S_0$

|   |              |              |              |
|---|--------------|--------------|--------------|
| H | -1.961114142 | 2.672773191  | 2.017813145  |
| O | -2.114880154 | 1.868581134  | 1.544143113  |
| C | -2.782208199 | 2.119344151  | 0.335574022  |
| H | -2.302056164 | 2.930876214  | -0.211694014 |
| H | -3.824900273 | 2.390062172  | 0.521471037  |
| C | -2.761992200 | 0.886133064  | -0.542418042 |
| H | -3.432859245 | 1.058078077  | -1.381457098 |
| O | -1.460364104 | 0.667419048  | -1.065028079 |
| C | -0.892512063 | -0.514245037 | -0.601513043 |
| H | -0.876000066 | -1.255999089 | -1.402775099 |
| N | 0.471695032  | -0.186649013 | -0.191809015 |
| C | 1.281137093  | 0.602434044  | -1.020910075 |
| H | 0.970985069  | 1.122474080  | -1.904874136 |
| C | 3.204108229  | 0.210589013  | 0.076986008  |

|   |              |              |              |
|---|--------------|--------------|--------------|
| N | 4.480358322  | 0.489276036  | 0.337954023  |
| H | 5.093256365  | -0.260863021 | 0.601759042  |
| H | 4.884246354  | 1.314435095  | -0.059211002 |
| N | 2.695953192  | -0.996934069 | 0.270373019  |
| C | 1.327536095  | -1.240920088 | 0.171869013  |
| O | 0.904305063  | -2.348314167 | 0.406552032  |
| C | -3.147234227 | -0.412252027 | 0.155765011  |
| H | -3.782488272 | -0.242495019 | 1.023875076  |
| C | -1.792015128 | -0.996196074 | 0.547779041  |
| H | -1.452328103 | -0.542997041 | 1.474837107  |
| O | -3.791155275 | -1.232623086 | -0.775146058 |
| H | -3.678497265 | -2.138960153 | -0.516534035 |
| N | 2.246489161  | 1.155701082  | -0.086901006 |
| O | -1.914388140 | -2.377309169 | 0.664560046  |
| H | -1.052644078 | -2.766263200 | 0.735194054  |
| O | 3.103421224  | 4.432353320  | -0.029700004 |
| H | 2.643311189  | 3.619977262  | 0.147818013  |
| H | 3.066476222  | 4.942988357  | 0.769188056  |
| O | 6.406805459  | -1.728478123 | 1.033835075  |
| H | 5.997264433  | -2.568936184 | 0.832829061  |
| H | 7.141748514  | -1.906991136 | 1.603075117  |
| O | 5.093076366  | -4.093950296 | 0.272438022  |
| H | 4.307231312  | -4.287159307 | 0.780121054  |
| H | 4.806284348  | -3.996110286 | -0.625376042 |
| O | 5.475905392  | 3.078176220  | -0.937402068 |
| H | 4.835236349  | 3.752039271  | -0.729763055 |
| H | 6.014827435  | 3.393333244  | -1.650487118 |
| O | 2.563396185  | -4.506870325 | 1.590254115  |
| H | 2.033743148  | -3.790536275 | 1.255610091  |
| H | 2.002890145  | -5.267912380 | 1.656718122  |

${}^3\Pi\Pi^*/S_0$

|   |              |              |              |
|---|--------------|--------------|--------------|
| H | -1.805696128 | 2.665017193  | 1.967870142  |
| O | -1.947923139 | 1.857120133  | 1.496320105  |
| C | -2.739885196 | 2.074903152  | 0.358526027  |
| H | -2.338211167 | 2.890399208  | -0.243167016 |
| H | -3.766022271 | 2.320886169  | 0.643269044  |
| C | -2.772181201 | 0.829133059  | -0.500658035 |
| H | -3.502887255 | 0.982569072  | -1.291364094 |
| O | -1.509729107 | 0.615618046  | -1.115379083 |
| C | -0.890199066 | -0.540957041 | -0.668283046 |
| H | -0.914812068 | -1.302334092 | -1.450137103 |
| N | 0.501631038  | -0.216103013 | -0.350218023 |

|   |              |              |              |
|---|--------------|--------------|--------------|
| C | 1.215552087  | 0.822361062  | -1.040345077 |
| H | 0.612521046  | 1.509896110  | -1.600626116 |
| C | 3.041984221  | 0.433493033  | 0.119015006  |
| N | 4.092058297  | 0.464019035  | 0.962371069  |
| H | 4.797341347  | -0.240759016 | 0.845002058  |
| H | 4.470615323  | 1.380118100  | 1.108168080  |
| N | 2.701637195  | -0.890561066 | -0.342064026 |
| C | 1.356621095  | -1.236054092 | -0.107923006 |
| O | 1.086620077  | -2.374126173 | 0.214761014  |
| C | -3.089855220 | -0.464387036 | 0.239531018  |
| H | -3.668082263 | -0.288814020 | 1.145368081  |
| C | -1.701232120 | -1.018023074 | 0.547612038  |
| H | -1.310175097 | -0.543990037 | 1.442905102  |
| O | -3.782697271 | -1.304935094 | -0.635769047 |
| H | -3.657650263 | -2.206331159 | -0.366473025 |
| N | 2.285867166  | 1.383077100  | -0.244164018 |
| O | -1.778945128 | -2.401004171 | 0.689983049  |
| H | -0.908110065 | -2.766338200 | 0.766909054  |
| O | 3.184216228  | 4.245433305  | -0.282542021 |
| H | 2.784011202  | 3.380317241  | -0.212705018 |
| H | 3.000386217  | 4.705806341  | 0.525142040  |
| O | 6.254784451  | -1.666248122 | 1.113417079  |
| H | 5.887612425  | -2.517232180 | 0.882293063  |
| H | 7.188753519  | -1.719939123 | 0.967238071  |
| O | 4.887062350  | -3.979995288 | 0.221744016  |
| H | 4.200386304  | -4.310860310 | 0.794722060  |
| H | 4.460869322  | -3.746573272 | -0.592078040 |
| O | 5.630775406  | 2.944313215  | -1.035143075 |
| H | 4.934350354  | 3.576939255  | -0.890249063 |
| H | 6.125797444  | 3.237188231  | -1.787962128 |
| O | 2.422472172  | -4.643083332 | 1.701459121  |
| H | 1.890402139  | -3.964600283 | 1.304941095  |
| H | 1.880527135  | -5.416653389 | 1.782873126  |

For 5AdCyd

S<sub>0</sub>-MIN

|   |              |             |              |
|---|--------------|-------------|--------------|
| H | -1.032382076 | 4.104704294 | 1.211232085  |
| O | -1.190596088 | 3.210034231 | 0.944792066  |
| C | -2.081939151 | 3.159214228 | -0.140338008 |
| H | -1.687720124 | 3.720283270 | -0.988589071 |
| H | -3.052597220 | 3.580212259 | 0.128340009  |
| C | -2.282197163 | 1.721516124 | -0.567323039 |
| H | -3.002288218 | 1.711295124 | -1.382554098 |
| O | -1.052712077 | 1.193361087 | -1.035342077 |

|   |              |              |              |
|---|--------------|--------------|--------------|
| C | -0.720933050 | 0.006046998  | -0.383664026 |
| H | -0.984606071 | -0.849122063 | -0.993358070 |
| N | 0.728533051  | -0.038466005 | -0.210980016 |
| C | 1.462034103  | 1.085827079  | -0.073187007 |
| H | 0.918705066  | 2.012993145  | -0.065465004 |
| C | 3.356901243  | -0.153790011 | 0.020228001  |
| N | 4.685014337  | -0.119517010 | 0.076798007  |
| H | 5.214348376  | -0.967522070 | -0.012182999 |
| H | 5.161763371  | 0.754962052  | 0.172291010  |
| N | 2.719221195  | -1.286160091 | -0.045127003 |
| C | 1.361943099  | -1.285610091 | -0.153426011 |
| O | 0.692324050  | -2.286016166 | -0.201462012 |
| C | -2.774195202 | 0.755673055  | 0.518771037  |
| H | -3.239073234 | 1.280970090  | 1.350958099  |
| C | -1.501621107 | 0.026096000  | 0.926087068  |
| H | -0.961506071 | 0.615188047  | 1.662773121  |
| O | -3.698785264 | -0.101336009 | -0.102575009 |
| H | -4.009880287 | -0.756702056 | 0.506263038  |
| H | -1.678266119 | -0.971313069 | 1.318801093  |
| N | 2.738761197  | 1.092351078  | 0.044677001  |
| O | 1.211281087  | -5.040425362 | -0.888218064 |
| H | 0.999253072  | -4.144608296 | -0.643272044 |
| H | 1.043465075  | -5.112654368 | -1.817821129 |
| O | 3.919094284  | -4.090045296 | 0.189929012  |
| H | 3.468360249  | -3.250645235 | 0.178319011  |
| H | 3.292883237  | -4.715865339 | -0.158741009 |
| O | 6.220181450  | 2.558736187  | 0.529974036  |
| H | 5.551934399  | 3.236242231  | 0.479197035  |
| H | 6.761047489  | 2.753057201  | 1.284120092  |
| O | 3.654118265  | 3.912395281  | 0.089154005  |
| H | 3.373894241  | 3.002071218  | 0.060445007  |
| H | 3.545156256  | 4.258709304  | -0.786279058 |
| O | 6.295905455  | -2.640590191 | -0.354640024 |
| H | 7.018383506  | -2.880421205 | 0.209411016  |
| H | 5.632530406  | -3.323475238 | -0.259299016 |

<sup>1</sup>ππ\*-MIN

|   |              |             |              |
|---|--------------|-------------|--------------|
| H | -1.151721082 | 4.174143303 | 1.204703086  |
| O | -1.338930096 | 3.277003236 | 0.967970071  |
| C | -2.139594155 | 3.219553230 | -0.184689014 |
| H | -1.678871122 | 3.773291272 | -1.003370071 |
| H | -3.127948224 | 3.642919260 | 0.007374000  |
| C | -2.310781164 | 1.780172126 | -0.619556045 |



|   |              |              |              |
|---|--------------|--------------|--------------|
| H | -3.011225217 | 1.765107127  | -1.452299104 |
| O | -1.067678077 | 1.262897089  | -1.052261075 |
| C | -0.752349054 | 0.068397006  | -0.402610032 |
| H | -1.039705075 | -0.776077055 | -1.018246075 |
| N | 0.686453051  | 0.012390003  | -0.239528018 |
| C | 1.373697100  | 1.042107074  | 0.422466032  |
| H | 0.848535063  | 1.975708141  | 0.507227035  |
| C | 3.331721238  | -0.054270006 | 0.160387009  |
| N | 4.652891336  | -0.217843017 | 0.083874007  |
| H | 5.037359362  | -1.117926082 | -0.133214012 |
| H | 5.249794378  | 0.587815041  | 0.093038007  |
| N | 2.619921190  | -1.285567090 | 0.128506012  |
| C | 1.337060095  | -1.187692085 | -0.166382011 |
| O | 0.685647050  | -2.253828161 | -0.399473027 |
| C | -2.825534206 | 0.815877058  | 0.457922035  |
| H | -3.317066240 | 1.340917099  | 1.274158092  |
| C | -1.557002114 | 0.098223008  | 0.896970064  |
| H | -1.034485074 | 0.692161048  | 1.640349119  |
| O | -3.727026269 | -0.056614002 | -0.180435011 |
| H | -4.093963292 | -0.669229046 | 0.441416033  |
| H | -1.744703126 | -0.896877066 | 1.294436095  |
| N | 2.760715200  | 1.091202080  | 0.268853021  |
| O | 1.090381078  | -5.190587376 | -1.114974082 |
| H | 0.775763057  | -4.311422312 | -0.956340068 |
| H | 1.045705077  | -5.336081385 | -2.051110147 |
| O | 3.626918263  | -4.287708307 | 0.376806026  |
| H | 3.236612232  | -3.422853244 | 0.427077029  |
| H | 2.991087213  | -4.832470350 | -0.075243004 |
| O | 6.385831461  | 2.368560171  | 0.363121026  |
| H | 5.678300407  | 3.008281219  | 0.322666023  |
| H | 6.893454495  | 2.568873185  | 1.138371083  |
| O | 3.846537278  | 3.759869268  | 0.146181008  |
| H | 3.463271252  | 2.881982210  | 0.186709016  |
| H | 3.603647260  | 4.124739299  | -0.693732048 |
| O | 5.946889426  | -2.888495207 | -0.559830042 |
| H | 6.763128489  | -3.105513225 | -0.128271009 |
| H | 5.311278381  | -3.556821254 | -0.310506022 |

<sup>1</sup>nπ\*-MIN

|   |              |             |              |
|---|--------------|-------------|--------------|
| H | -1.177539084 | 4.230748303 | 1.178106087  |
| O | -1.334691096 | 3.333232240 | 0.922342065  |
| C | -2.168971155 | 3.275507236 | -0.206837014 |
| H | -1.730260122 | 3.828239276 | -1.038634073 |

|   |              |              |              |
|---|--------------|--------------|--------------|
| H | -3.149993224 | 3.701902266  | 0.012772000  |
| C | -2.357954167 | 1.837407133  | -0.637717049 |
| H | -3.069439223 | 1.831115130  | -1.461595108 |
| O | -1.126084079 | 1.310349096  | -1.084136077 |
| C | -0.824851057 | 0.097619005  | -0.451639034 |
| H | -1.128913082 | -0.736769055 | -1.071897075 |
| N | 0.611983043  | 0.013330001  | -0.309833020 |
| C | 1.307863095  | 1.059993074  | 0.342371023  |
| H | 0.860174062  | 2.031144146  | 0.257674019  |
| C | 3.330554238  | -0.134987010 | 0.212314014  |
| N | 4.656798336  | -0.286951020 | 0.357802027  |
| H | 5.068655365  | -1.115080082 | -0.032939003 |
| H | 5.207131377  | 0.550629042  | 0.341446027  |
| N | 2.527713181  | -1.200287086 | 0.009395002  |
| C | 1.182538084  | -1.240494090 | -0.288280022 |
| O | 0.584910043  | -2.253215162 | -0.506018034 |
| C | -2.873495207 | 0.877340064  | 0.443455033  |
| H | -3.337059239 | 1.407776099  | 1.272823094  |
| C | -1.615408117 | 0.127233007  | 0.855187064  |
| H | -1.072915080 | 0.701903053  | 1.600358114  |
| O | -3.810653276 | 0.035457003  | -0.184127012 |
| H | -4.135586295 | -0.612154046 | 0.425359028  |
| H | -1.814604128 | -0.869944061 | 1.240609091  |
| N | 2.692193191  | 0.997675071  | 0.280140022  |
| O | 1.322848093  | -4.946095358 | -0.719600052 |
| H | 1.052079075  | -4.030995290 | -0.660646050 |
| H | 1.081062076  | -5.251872377 | -1.584233115 |
| O | 3.959325286  | -4.961765355 | 0.374027025  |
| H | 3.868975277  | -5.187631376 | 1.289186091  |
| H | 3.086133220  | -5.016197363 | -0.012943003 |
| O | 6.311422456  | 2.407290172  | 0.449207031  |
| H | 5.642430408  | 3.077520220  | 0.343005025  |
| H | 6.822068489  | 2.645136189  | 1.211970087  |
| O | 3.764960271  | 3.833059276  | 0.035103005  |
| H | 3.389866244  | 2.961548211  | 0.084586004  |
| H | 3.537930256  | 4.175496298  | -0.819399061 |
| O | 5.712700410  | -2.924741213 | -0.593658042 |
| H | 6.537055470  | -3.294020238 | -0.875595065 |
| H | 5.169546373  | -3.646322261 | -0.279708018 |

$^3\Pi\Pi^*$ -MIN

|   |              |             |             |
|---|--------------|-------------|-------------|
| H | -1.208007089 | 4.214001304 | 1.108155078 |
| O | -1.361297096 | 3.306111239 | 0.888997066 |

|   |              |              |              |
|---|--------------|--------------|--------------|
| C | -2.174243157 | 3.196521229  | -0.250798017 |
| H | -1.735382124 | 3.734459267  | -1.091836077 |
| H | -3.168735227 | 3.606056260  | -0.060289005 |
| C | -2.323873168 | 1.740982126  | -0.637908044 |
| H | -3.019081218 | 1.688431121  | -1.473386108 |
| O | -1.072222075 | 1.222016088  | -1.046276075 |
| C | -0.755451054 | 0.048177006  | -0.357680026 |
| H | -1.033278074 | -0.816493057 | -0.949027066 |
| N | 0.682121047  | -0.008295002 | -0.172452013 |
| C | 1.372217097  | 1.106121079  | 0.333604022  |
| H | 0.887354066  | 2.050033149  | 0.185239015  |
| C | 3.353264240  | -0.054727003 | 0.181822011  |
| N | 4.693073336  | -0.208617012 | 0.214618015  |
| H | 5.080694364  | -1.070581075 | -0.119355008 |
| H | 5.261043379  | 0.614493047  | 0.151031013  |
| N | 2.649818191  | -1.279330091 | 0.157136009  |
| C | 1.294936094  | -1.217592087 | -0.144593011 |
| O | 0.723287052  | -2.273659163 | -0.364948026 |
| C | -2.836117206 | 0.809094059  | 0.468756034  |
| H | -3.332410237 | 1.357856100  | 1.266330089  |
| C | -1.565442111 | 0.114583009  | 0.934521068  |
| H | -1.047157076 | 0.739338051  | 1.655953122  |
| O | -3.732181270 | -0.086545008 | -0.143857010 |
| H | -4.082599296 | -0.694117051 | 0.492268035  |
| H | -1.745419124 | -0.867783065 | 1.365485100  |
| N | 2.761222199  | 1.086338079  | 0.281911019  |
| O | 1.119052081  | -5.125606368 | -1.089901077 |
| H | 0.870322063  | -4.222553306 | -0.936502070 |
| H | 1.035434074  | -5.280826379 | -2.021455144 |
| O | 3.677374266  | -4.389512316 | 0.362701029  |
| H | 3.272505235  | -3.552072253 | 0.549314041  |
| H | 3.014992218  | -4.889876350 | -0.104350007 |
| O | 6.406474459  | 2.433831173  | 0.397241031  |
| H | 5.707070409  | 3.080917220  | 0.355272026  |
| H | 6.901346496  | 2.614231190  | 1.185511087  |
| O | 3.845623278  | 3.815786275  | 0.154874009  |
| H | 3.471992252  | 2.938713212  | 0.213823016  |
| H | 3.602811260  | 4.159663299  | -0.694025048 |
| O | 5.900098426  | -2.880513208 | -0.676958050 |
| H | 6.735652485  | -3.124844224 | -0.303228020 |
| H | 5.274806379  | -3.554496255 | -0.417431032 |

<sup>3</sup>nπ\*-MIN

|   |              |              |              |
|---|--------------|--------------|--------------|
| H | -1.192785088 | 4.244721308  | 1.125042082  |
| O | -1.359575100 | 3.342769242  | 0.892138067  |
| C | -2.188038157 | 3.264382237  | -0.239569018 |
| H | -1.745346124 | 3.800784274  | -1.079820076 |
| H | -3.169769229 | 3.695790264  | -0.032709001 |
| C | -2.377423170 | 1.818247133  | -0.643517048 |
| H | -3.087375220 | 1.796099128  | -1.468336106 |
| O | -1.146187084 | 1.278035093  | -1.078490079 |
| C | -0.840354062 | 0.087841005  | -0.406995027 |
| H | -1.138721081 | -0.766637057 | -1.002395073 |
| N | 0.593804042  | 0.008736002  | -0.247539020 |
| C | 1.311102094  | 1.087090077  | 0.316339021  |
| H | 0.868673062  | 2.053493148  | 0.171492011  |
| C | 3.327411237  | -0.109906008 | 0.190378014  |
| N | 4.654167336  | -0.266754018 | 0.332052024  |
| H | 5.062747365  | -1.099134077 | -0.052227006 |
| H | 5.210312373  | 0.566859040  | 0.324500025  |
| N | 2.532085180  | -1.189270087 | -0.007982999 |
| C | 1.189095088  | -1.225052089 | -0.271001020 |
| O | 0.601227044  | -2.252408162 | -0.496292037 |
| C | -2.894436211 | 0.881582065  | 0.456543031  |
| H | -3.370475243 | 1.427949103  | 1.268137092  |
| C | -1.633331117 | 0.153703009  | 0.896303062  |
| H | -1.094562081 | 0.755289052  | 1.622423118  |
| O | -3.817017273 | 0.014915004  | -0.158782010 |
| H | -4.146439297 | -0.616630044 | 0.464977031  |
| H | -1.827188132 | -0.832066061 | 1.312952092  |
| N | 2.689928191  | 1.017489071  | 0.276592021  |
| O | 1.313104093  | -4.964473356 | -0.772633053 |
| H | 1.044420076  | -4.050855291 | -0.705432051 |
| H | 1.078823079  | -5.260134379 | -1.641990119 |
| O | 3.943719283  | -4.960368359 | 0.361526028  |
| H | 3.846584279  | -5.184089376 | 1.277550092  |
| H | 3.075581219  | -5.026156362 | -0.034494001 |
| O | 6.341415455  | 2.408465173  | 0.442602031  |
| H | 5.662690408  | 3.071260222  | 0.350863027  |
| H | 6.851516494  | 2.639648192  | 1.207712088  |
| O | 3.789954270  | 3.820759276  | 0.069968006  |
| H | 3.410551243  | 2.950689213  | 0.130912011  |
| H | 3.562072258  | 4.154367298  | -0.787633058 |
| O | 5.693423409  | -2.919790209 | -0.613058045 |
| H | 6.530373469  | -3.291051236 | -0.854596063 |
| H | 5.146799371  | -3.636054259 | -0.293429023 |

${}^1\pi\pi^*/{}^1n\pi^*$

|   |              |              |              |
|---|--------------|--------------|--------------|
| H | -1.167875085 | 4.147265301  | 1.185339083  |
| O | -1.326343097 | 3.245290231  | 0.946143066  |
| C | -2.155510156 | 3.167730230  | -0.186279012 |
| H | -1.725954122 | 3.728099271  | -1.017540073 |
| H | -3.145858228 | 3.574420255  | 0.029789001  |
| C | -2.314191167 | 1.724975123  | -0.617109045 |
| H | -3.038919216 | 1.702092123  | -1.428955101 |
| O | -1.077226075 | 1.227943090  | -1.088531079 |
| C | -0.711322053 | 0.045111006  | -0.438039031 |
| H | -0.982226069 | -0.813255059 | -1.042098078 |
| N | 0.730439052  | 0.034698004  | -0.305431022 |
| C | 1.397083099  | 1.108731082  | 0.315454020  |
| H | 0.869118063  | 2.048806146  | 0.321690025  |
| C | 3.421413247  | 0.039866002  | 0.134381012  |
| N | 4.744714342  | -0.085606004 | 0.138709009  |
| H | 5.162055371  | -0.976607070 | -0.069355007 |
| H | 5.311296384  | 0.743747056  | 0.132013007  |
| N | 2.685440191  | -1.136533081 | 0.153032012  |
| C | 1.369647100  | -1.179095082 | -0.173577012 |
| O | 0.792407057  | -2.241851160 | -0.330882024 |
| C | -2.781296199 | 0.750475052  | 0.472373035  |
| H | -3.262571234 | 1.266437089  | 1.301214094  |
| C | -1.489242105 | 0.057301006  | 0.878657065  |
| H | -0.961162068 | 0.660438046  | 1.611242116  |
| O | -3.683853263 | -0.137429009 | -0.142893013 |
| H | -3.990323288 | -0.782190058 | 0.479163035  |
| H | -1.645592117 | -0.941913066 | 1.278221094  |
| N | 2.784219200  | 1.161677086  | 0.118430006  |
| O | 1.202924087  | -5.065285363 | -1.038736077 |
| H | 0.952281067  | -4.161784300 | -0.877629064 |
| H | 1.043231073  | -5.237000375 | -1.958363140 |
| O | 3.766811269  | -4.424861319 | 0.394963029  |
| H | 3.313315236  | -3.684522265 | 0.784286055  |
| H | 3.106125224  | -4.863117349 | -0.135192007 |
| O | 6.325085453  | 2.534724182  | 0.454668034  |
| H | 5.634896405  | 3.186972231  | 0.359662027  |
| H | 6.786690487  | 2.736471198  | 1.258076088  |
| O | 3.782841271  | 3.915976282  | 0.036210001  |
| H | 3.425875248  | 3.031149217  | 0.007799999  |
| H | 3.562747256  | 4.324697310  | -0.791059058 |
| O | 6.000608431  | -2.773372199 | -0.475571033 |
| H | 6.805788489  | -3.044456220 | -0.056467007 |

H 5.352871385 -3.454491249 -0.295766023

${}^1\Pi\Pi^*/S_0$

|   |              |              |              |
|---|--------------|--------------|--------------|
| H | -0.871495063 | 4.041397290  | 1.502870108  |
| O | -1.169618084 | 3.196441228  | 1.197627087  |
| C | -1.832406132 | 3.319531238  | -0.035385003 |
| H | -1.225333087 | 3.884137279  | -0.743754051 |
| H | -2.789491202 | 3.831867278  | 0.088563004  |
| C | -2.092671151 | 1.949201139  | -0.623197044 |
| H | -2.693476192 | 2.084981153  | -1.519921109 |
| O | -0.865274061 | 1.345545098  | -0.978397070 |
| C | -0.712052053 | 0.083341003  | -0.401382028 |
| H | -0.946199068 | -0.695916052 | -1.121487080 |
| N | 0.669114050  | -0.097254005 | -0.039601001 |
| C | 1.407918104  | 0.756729054  | 0.809805056  |
| H | 0.847073062  | 1.507478109  | 1.337009098  |
| C | 3.315334238  | -0.041922004 | 0.224635017  |
| N | 4.560352327  | -0.243550019 | -0.198675015 |
| H | 4.954285355  | -1.165869085 | -0.191098012 |
| H | 5.170829374  | 0.548580041  | -0.274555022 |
| N | 2.563095184  | -1.220644090 | 0.534542037  |
| C | 1.317437097  | -1.284271093 | -0.117419007 |
| O | 0.910387067  | -2.313987169 | -0.589530041 |
| C | -2.818679201 | 0.953320069  | 0.292938020  |
| H | -3.333201241 | 1.454046103  | 1.110588081  |
| C | -1.688746119 | 0.055956007  | 0.778082055  |
| H | -1.223662089 | 0.494590034  | 1.655627117  |
| O | -3.739953270 | 0.257723021  | -0.512593035 |
| H | -4.223262303 | -0.371955026 | 0.003864999  |
| H | -2.016704143 | -0.953565068 | 1.017119075  |
| N | 2.720511196  | 1.084644077  | 0.388870029  |
| O | 1.111622078  | -5.145264371 | -1.213157089 |
| H | 0.938738066  | -4.212802305 | -1.156471083 |
| H | 1.102895077  | -5.374059388 | -2.133385154 |
| O | 3.508389253  | -4.660788333 | 0.538749039  |
| H | 3.090852222  | -3.961240283 | 1.023911076  |
| H | 2.834982205  | -5.004704358 | -0.042407005 |
| O | 6.264888450  | 2.354893168  | 0.163500011  |
| H | 5.559195398  | 2.997748215  | 0.157944010  |
| H | 6.780353489  | 2.517724183  | 0.942150069  |
| O | 3.726221268  | 3.783290272  | 0.028985001  |
| H | 3.321498237  | 2.920204211  | 0.126458011  |
| H | 3.452526250  | 4.118088298  | -0.814499059 |

|   |             |              |              |
|---|-------------|--------------|--------------|
| O | 5.654228409 | -3.033090218 | -0.452687032 |
| H | 6.513069468 | -3.367519243 | -0.234955016 |
| H | 5.017641360 | -3.697172268 | -0.192264012 |

${}^1n\pi^*/S_0$

|   |              |              |              |
|---|--------------|--------------|--------------|
| H | -1.156305085 | 4.205066305  | 1.218536086  |
| O | -1.322364097 | 3.313516239  | 0.947862066  |
| C | -2.164087156 | 3.289698235  | -0.179354013 |
| H | -1.723283127 | 3.856675277  | -0.999917073 |
| H | -3.139025227 | 3.720373267  | 0.057089002  |
| C | -2.369294171 | 1.865387136  | -0.646350046 |
| H | -3.105441226 | 1.884745133  | -1.448208103 |
| O | -1.153856085 | 1.354440096  | -1.146078084 |
| C | -0.816231056 | 0.136651007  | -0.550877041 |
| H | -1.132029084 | -0.690498050 | -1.176286082 |
| N | 0.630427045  | 0.077755003  | -0.475177034 |
| C | 1.358904098  | 0.941773067  | 0.331621025  |
| H | 0.956862069  | 1.822424130  | 0.794618055  |
| C | 3.297077236  | -0.117104009 | 0.239953016  |
| N | 4.620098333  | -0.254405016 | 0.390704030  |
| H | 5.029562364  | -1.145371082 | 0.179604012  |
| H | 5.194860376  | 0.560322039  | 0.294957022  |
| N | 2.512744180  | -1.234843091 | 0.330255023  |
| C | 1.212193087  | -1.178358087 | -0.171662014 |
| O | 0.593386045  | -2.193875157 | -0.366486027 |
| C | -2.849117207 | 0.873247063  | 0.421187032  |
| H | -3.295375238 | 1.378022097  | 1.275864091  |
| C | -1.573075111 | 0.123538011  | 0.781777056  |
| H | -1.029047074 | 0.679519051  | 1.539106113  |
| O | -3.795352275 | 0.037921000  | -0.201653013 |
| H | -4.104677295 | -0.622419042 | 0.402263029  |
| H | -1.759422128 | -0.884283065 | 1.145736082  |
| N | 2.699621194  | 0.954093070  | -0.238514019 |
| O | 1.307236094  | -4.943114354 | -0.691062052 |
| H | 1.052560076  | -4.032824291 | -0.579744040 |
| H | 1.061131075  | -5.200504374 | -1.569804113 |
| O | 3.970203286  | -5.003689359 | 0.362250027  |
| H | 3.890219278  | -5.261769378 | 1.270792091  |
| H | 3.087430223  | -5.008157361 | -0.003726001 |
| O | 6.271075453  | 2.409886173  | 0.444585032  |
| H | 5.580104403  | 3.056006223  | 0.331347023  |
| H | 6.766095485  | 2.660067190  | 1.213681086  |
| O | 3.715363266  | 3.785880272  | -0.092188006 |

|   |             |              |              |
|---|-------------|--------------|--------------|
| H | 3.341726239 | 2.953205213  | -0.363229026 |
| H | 3.572608257 | 4.385700313  | -0.813099057 |
| O | 5.718848413 | -2.900937206 | -0.455822032 |
| H | 6.500228469 | -3.278360237 | -0.832954058 |
| H | 5.147300370 | -3.622915259 | -0.198031012 |

${}^3\Pi\Pi^*/S_0$

|   |              |              |              |
|---|--------------|--------------|--------------|
| H | -0.978226071 | 4.121049299  | 1.478386108  |
| O | -1.214131088 | 3.260163234  | 1.163789085  |
| C | -1.871417132 | 3.346098243  | -0.074898007 |
| H | -1.277997093 | 3.921887281  | -0.785762057 |
| H | -2.845798207 | 3.827708278  | 0.036083004  |
| C | -2.080843151 | 1.960811140  | -0.647607049 |
| H | -2.680759195 | 2.065824148  | -1.548848112 |
| O | -0.831998062 | 1.396111101  | -0.986414073 |
| C | -0.651894046 | 0.134757008  | -0.413395029 |
| H | -0.884540066 | -0.641872048 | -1.137016082 |
| N | 0.739864054  | -0.013062000 | -0.070532003 |
| C | 1.398339101  | 0.852315060  | 0.855701059  |
| H | 0.833695059  | 1.715445123  | 1.152314083  |
| C | 3.354367241  | -0.044915004 | 0.398992031  |
| N | 4.631108332  | -0.294304023 | 0.110795010  |
| H | 4.933675356  | -1.229279088 | -0.083919008 |
| H | 5.227567377  | 0.482464032  | -0.102040005 |
| N | 2.559613187  | -1.228750091 | 0.644662045  |
| C | 1.334767096  | -1.228927090 | -0.048671003 |
| O | 0.924409068  | -2.281609162 | -0.492124036 |
| C | -2.779708202 | 0.952335069  | 0.275829021  |
| H | -3.310400237 | 1.445799103  | 1.087800079  |
| C | -1.624236116 | 0.092627006  | 0.769337057  |
| H | -1.168540086 | 0.556848038  | 1.638475117  |
| O | -3.680282264 | 0.224783018  | -0.525652040 |
| H | -4.143591297 | -0.416273028 | -0.005329000 |
| H | -1.924969139 | -0.921798065 | 1.022803074  |
| N | 2.778378200  | 1.083050078  | 0.513983036  |
| O | 1.116490080  | -5.120996371 | -1.290904091 |
| H | 0.920828067  | -4.196952303 | -1.197438086 |
| H | 1.190204084  | -5.298153383 | -2.219599162 |
| O | 3.466004251  | -4.869863348 | 0.524744040  |
| H | 3.059454220  | -4.429525318 | 1.259494093  |
| H | 2.757598198  | -5.084982367 | -0.077344007 |
| O | 6.325068456  | 2.336067169  | 0.159050011  |
| H | 5.622672406  | 2.982028217  | 0.125607009  |



|   |             |              |              |
|---|-------------|--------------|--------------|
| H | 6.816553489 | 2.508661181  | 0.950811070  |
| O | 3.792459274 | 3.749624270  | 0.025048002  |
| H | 3.408503243 | 2.886292210  | 0.181348011  |
| H | 3.463677247 | 4.050962291  | -0.810674060 |
| O | 5.437380394 | -3.117152225 | -0.580685039 |
| H | 6.299667455 | -3.508860253 | -0.549121040 |
| H | 4.827299347 | -3.768409274 | -0.235386015 |
